# Supplementary material for: The Eel Ascending: The Influence of Lateral Slope, Climbing Substrate and Flow Rate on Eel Pass Performance
Source: MDPI journal article supplement (doi:10.3390/fishes8120612), 2023-12-18
Supplement: s1 [file s1]

Archive with 2 entries (2 files):
- Table S1.pdf
- Table S2.pdf
