# Supplementary material for: The Eel Ascending: The Influence of Lateral Slope, Climbing Substrate and Flow Rate on Eel Pass Performance
Source: MDPI journal article supplement (doi:10.3390/fishes8120612), 2023-12-18
Supplement: s1 [file s1]

Table S1. Summary of trials analysed and average attempt and success rates for eels tracked in the lower pass section (from 0.25 to 0.5 m), for 4 different substrate and lateral slope combinations, and 5 discharge levels.

| Substrate & lateral slope                                                                                   | Flow rate (L s <sup>-1</sup> ) | No. trials analysed | Median no. attempts/trial (range) | Median no. successes/trial (range) | Median success rate (%) /trial (range) |
|-------------------------------------------------------------------------------------------------------------|--------------------------------|---------------------|-----------------------------------|------------------------------------|----------------------------------------|
| Laterally flat bristle<br> | 0.2                            | 3                   | 88<br>(54–262)                    | 12<br>(3–20)                       | 5.6<br>(4.6–22.7)                      |
|                                                                                                             | 0.3                            | 3                   | 11<br>(10–74)                     | 0<br>(0–0)                         | 0<br>(0–0)                             |
|                                                                                                             | 0.4                            | 4                   | 40.5<br>(4–147)                   | 0.5<br>(0–2)                       | 0.7<br>(0–1.4)                         |
|                                                                                                             | 0.5                            | 3                   | 2<br>(1–9)                        | 0<br>(0–0)                         | 0<br>(0–0)                             |
|                                                                                                             | 0.6                            | 4                   | 9<br>(6–12)                       | 0.5<br>(0–5)                       | 8.3<br>(0–45.5)                        |
| V-profile bristle<br>      | 0.2                            | 5                   | 47<br>(28–65)                     | 31<br>(23–42)                      | 68.1<br>(59.6–85.7)                    |
|                                                                                                             | 0.3                            | 4                   | 17.5<br>(13–24)                   | 13.5<br>(9–21)                     | 77.3<br>(69.2–87.5)                    |
|                                                                                                             | 0.4                            | 3                   | 34<br>(9–35)                      | 19<br>(8–29)                       | 85.3<br>(54.3–88.9)                    |
|                                                                                                             | 0.5                            | 4                   | 12.5<br>(8–19)                    | 8<br>(6–12)                        | 64.9<br>(62.8–75)                      |
|                                                                                                             | 0.6                            | 3                   | 16<br>(15–17)                     | 12<br>(10–14)                      | 70.6<br>(66.7–87.5)                    |
| Laterally flat studs<br> | 0.2                            | 3                   | 44<br>(42–76)                     | 5<br>(5–16)                        | 11.9<br>(11.4–21.1)                    |
|                                                                                                             | 0.3                            | 3                   | 139<br>(57–212)                   | 3<br>(2–6)                         | 2.8<br>(2.2–3.5)                       |
|                                                                                                             | 0.4                            | 4                   | 60<br>(51–99)                     | 2.5<br>(0–5)                       | 4<br>(0–5.9)                           |
|                                                                                                             | 0.5                            | 5                   | 79<br>(44–217)                    | 1<br>(0–13)                        | 2.2<br>(0–6)                           |
|                                                                                                             | 0.6                            | 3                   | 42<br>(20–256)                    | 0<br>(0–5)                         | 0<br>(0–2)                             |
| V-profile studs<br>      | 0.2                            | 3                   | 75<br>(37–77)                     | 13<br>(13–15)                      | 19.5<br>(16.9–35.1)                    |
|                                                                                                             | 0.3                            | 3                   | 33<br>(23–116)                    | 9<br>(9–17)                        | 27.3<br>(14.7–39.1)                    |
|                                                                                                             | 0.4                            | 3                   | 41<br>(40–58)                     | 4<br>(1–5)                         | 8.6<br>(2.5–9.8)                       |
|                                                                                                             | 0.5                            | 5                   | 45<br>(25–171)                    | 9<br>(3–20)                        | 14.2<br>(6.7–28)                       |
|                                                                                                             | 0.6                            | 3                   | 39<br>(22–99)                     | 5<br>(4–13)                        | 13.1<br>(10.3–22.7)                    |
