# Supplementary material for: The Eel Ascending: The Influence of Lateral Slope, Climbing Substrate and Flow Rate on Eel Pass Performance
Source: MDPI journal article supplement (doi:10.3390/fishes8120612), 2023-12-18
Supplement: s1 [file s1 › Table S2.pdf]

Table S2. Summary of generalised linear model (GLM) comparisons using Akaike's information criterion (AIC) relative to the null model for the two modelled response variables.

| Dependent variable                                                              | Model type   | Model                                                                                               | DF    | AIC     | $\Delta AIC_{\text{null}}$ | Deviance explained (%) |
|---------------------------------------------------------------------------------|--------------|-----------------------------------------------------------------------------------------------------|-------|---------|----------------------------|------------------------|
| Ascent attempt outcome<br>(0 or 1 binary response)                              | Binomial GLM | null                                                                                                | 4030  | 3442    |                            | 0                      |
|                                                                                 |              | substrate * lateral slope * flow rate<br>(maximal model)                                            | 4023  | 2391    | -1051                      | 31.0                   |
|                                                                                 |              | substrate * lateral slope +<br>substrate * flow rate + lateral<br>slope * flow rate<br>(best model) | 4024  | 2389    | -1053                      | 31.0                   |
|                                                                                 |              | substrate * lateral slope +<br>lateral slope * flow rate                                            | 4025  | 2392    | -1050                      | 30.8                   |
|                                                                                 |              | substrate + lateral slope +<br>flow rate                                                            | 4027  | 2505    | -937                       | 27.4                   |
| Speed of ascent step<br>(m s <sup>-1</sup> )<br>(continuous numerical response) | Gamma GLM    | null                                                                                                | 31392 | -165545 |                            | 0                      |
|                                                                                 |              | substrate * lateral slope *<br>flow rate<br>(maximal model) (best model)                            | 31373 | -182280 | -16735                     | 35.7                   |
|                                                                                 |              | substrate * lateral slope +<br>substrate * flow rate + lateral<br>slope * flow rate                 | 31386 | -182088 | -16543                     | 35.3                   |
|                                                                                 |              | substrate + lateral slope +<br>flow rate                                                            | 31389 | -181798 | -16253                     | 34.8                   |
